# Supplementary material for: The Recruitment of the Recalcitrant-Seeded Cryptocarya alba (Mol.) Looser, Established via Direct Seeding Is Mainly Affected by the Seed Source and Forest Cover
Source: MDPI journal article supplement (doi:10.3390/plants11212918), 2022-10-29
Supplement: s1 [file s1]

**Table S1.** Means per mother within seed source (plus standard errors) for germination (Germin), survival (Surv) on *C. alba* in the field experiment. Seed sources were Cuesta La Dormida (CD), Antumapu (AN), Cantillana (CA) and Cayumanque (CY).

| Seed source | Mother | Germin      | Surv        |
|-------------|--------|-------------|-------------|
| CD          | 1      | 12.5 (1.4)  | 2.5 (1.4)   |
|             | 2      | 0.0 (0.0)   | 0.0 (0.0)   |
|             | 3      | 15.8 (9.8)  | 8.3 (4.8)   |
|             | 4      | 19.2 (10.2) | 3.3 (1.9)   |
|             | 5      | 5.0 (1.4)   | 1.7 (1.0)   |
|             | 6      | 5.8 (5.8)   | 0.8 (0.5)   |
|             | 7      | 36.7 (13.4) | 0.0 (0.0)   |
|             | 8      | 16.7 (7.4)  | 3.3 (1.9)   |
|             | 9      | 1.7 (0.8)   | 0.0 (0.0)   |
|             | 10     | 0.0 (0.0)   | 0.0 (0.0)   |
|             | 11     | 0.0 (0.0)   | 0.0 (0.0)   |
| AN          | 12     | 15 (10.4)   | 8.3 (4.8)   |
|             | 13     | 13.3 (3.3)  | 0.0 (0.0)   |
|             | 14     | 0.8 (0.8)   | 0.0 (0.0)   |
|             | 15     | 0.8 (0.8)   | 0.0 (0.0)   |
|             | 16     | 25 (12.8)   | 9.2 (5.3)   |
|             | 17     | 25.8 (13)   | 14.2 (8.2)  |
| CA          | 18     | 0.8 (0.8)   | 0.0 (0.0)   |
|             | 19     | 59.2 (25.8) | 23.3 (13.5) |
|             | 20     | 66.7 (8.3)  | 23.3 (13.5) |
|             | 21     | 40.8 (21.9) | 17.5 (10.1) |
|             | 22     | 50 (16.1)   | 25.8 (14.9) |
|             | 23     | 43.3 (14.2) | 16.7 (9.6)  |
|             | 24     | 35 (8.0)    | 9.2 (5.3)   |
|             | 25     | 45 (4.3)    | 15.8 (9.1)  |
|             | 26     | 48.3 (6)    | 11.7 (6.7)  |
|             | 27     | 55 (15.3)   | 19.2 (11.1) |
|             | 28     | 25 (10.1)   | 10 (5.8)    |
|             | 29     | 27.5 (11.8) | 0.8 (0.5)   |
|             | 30     | 20 (8.7)    | 1.7 (1.0)   |
|             | 31     | 25.8 (15.2) | 0.0 (0.0)   |
|             | 32     | 53.3 (26.2) | 29.2 (16.8) |
|             | 33     | 16.7 (1.7)  | 5 (2.9)     |
|             | 34     | 20 (8.8)    | 8.3 (4.8)   |
| CY          | 35     | 15 (8.0)    | 5.8 (3.4)   |
|             | 36     | 41.7 (9.3)  | 1.7 (1.0)   |
|             | 37     | 5.8 (2.2)   | 0.8 (0.5)   |
|             | 38     | 21.7 (8.2)  | 7.5 (4.3)   |
